# Supplementary material
Source: PubMed Central journal article supplement (PMC4030807)
Supplement: jp501893c_si_001.pdf [file jp501893c_si_001.pdf]

# Single Molecule FRET Studies of the Human Telomerase RNA Pseudoknot: Temperature/Urea Dependent Folding Kinetics and Thermodynamics

Erik D. Holmstrom<sup>1,2</sup> and David J. Nesbitt<sup>1,2\*</sup>

<sup>1</sup>JILA, University of Colorado and National Institute of Standards and Technology, and <sup>2</sup>Department of Chemistry and Biochemistry, University of Colorado, Boulder, Colorado 80309-0440

a) **alternate hTR PK**

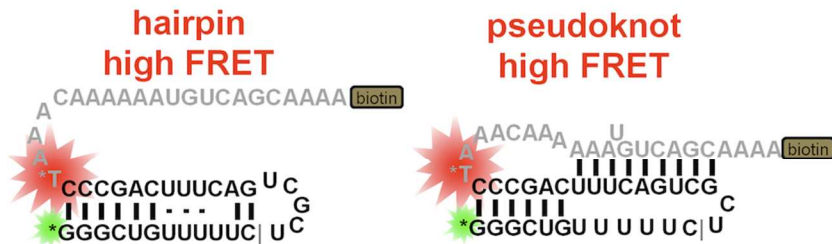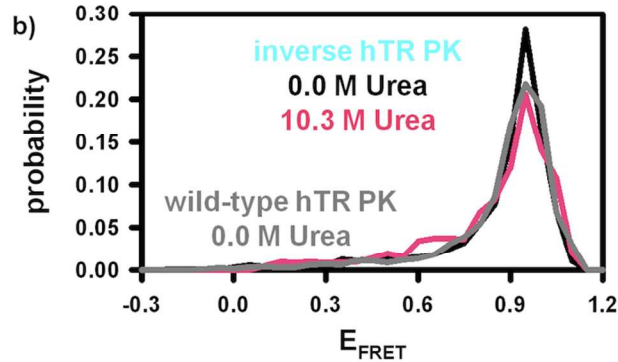

**Supplemental Figure 1.** a) Details of the alternative labeling scheme for the wild-type human telomerase RNA pseudoknot secondary structure. The minimal pseudoknot motif is in a partially unfolded (hairpin) conformation and a folded (pseudoknot) conformation. The green (Cy3) and red (Cy5) stars indicate the location of the two fluorophores, while the size of the stars represents the FRET efficiency between the two dyes. The grey vertical bar represents the location of the ligation site. See Materials and Methods for details b) Freely diffusing FRET histograms of alternate wild-type human telomerase RNA pseudoknot. The nearly identical FRET values at high and low urea concentrations confirm that: (i) the P2 region of the pseudoknot remains intact under all experimental conditions and (ii) the dynamics associated with the conventional constructs results from formation/disruption of the P3 region of the pseudoknot.
